# Supplementary material for: Synergism between hierarchical MFI zeolites and alumina in alkene cross-metathesis reactions as a function of composition
Source: Royal Society of Chemistry journal article supplement (doi:10.1039/d3ra01642k), 2023-01-01
Supplement: d3ra01642k1.pdf [file d3ra01642k1.pdf]

# **Synergism between Hierarchical MFI Zeolites and Alumina in Alkene Cross-Metathesis Reactions as a Function of Composition**

Ning Wei,<sup>abc</sup> Weiping Zhang,<sup>c,\*</sup> Dazhi Zhang<sup>a</sup> and Shengjun Huang<sup>a,\*</sup>

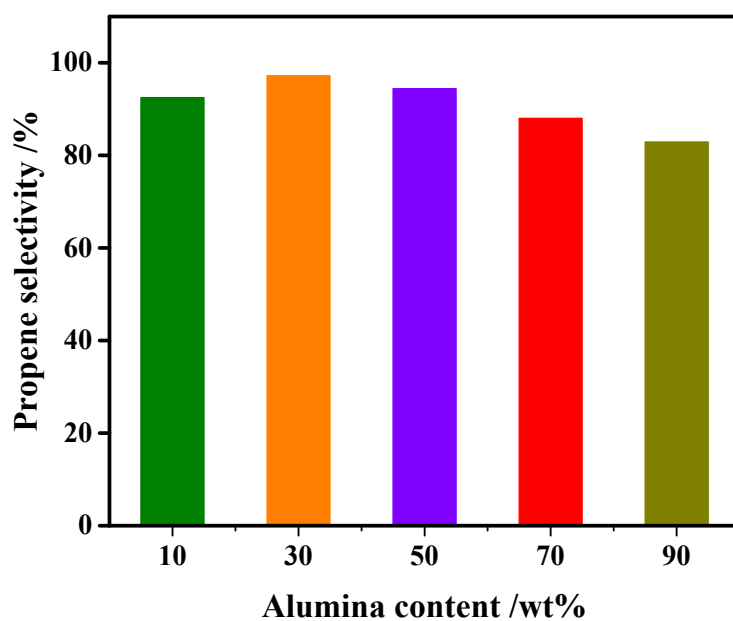

**Figure S1** Propene selectivity of 3Mo/hZ-xAl catalysts with different alumina content. Reaction conditions: time on stream (TOS) = 4 h, T = 383 K, P = 0.1 MPa, WHSV = 1.5 g•g<sup>-1</sup>•h<sup>-1</sup> (feed composition of metathesis reaction: 53 mol % ethene, 44 mol % 2-butene and 3 mol % 1-butene), ethene/2-butene = 1.2 (molar ratio).

**Table S1.** Products distribution of 2-butene/ethene cross-metathesis reaction over supported Mo-based catalysts

| Catalysts   | Conversion/% | Selectivity/%               |                             |                             |                             |
|-------------|--------------|-----------------------------|-----------------------------|-----------------------------|-----------------------------|
|             |              | C <sub>2</sub> <sup>=</sup> | C <sub>3</sub> <sup>=</sup> | C <sub>5</sub> <sup>=</sup> | C <sub>6</sub> <sup>=</sup> |
| 3Mo/hZ      | 0.8          | 71.2                        | 11.6                        | 8.2                         | 9.0                         |
| 3Mo/hZ-10Al | 24.1         | 92.5                        | 6.5                         | 0.8                         | 0.2                         |
| 3Mo/hZ-30Al | 49.2         | 97.2                        | 2.3                         | 0.3                         | 0.2                         |
| 3Mo/hZ-50Al | 30.3         | 94.4                        | 4.6                         | 0.6                         | 0.4                         |
| 3Mo/hZ-70Al | 10.9         | 88.0                        | 9.0                         | 1.9                         | 1.1                         |
| 3Mo/hZ-90Al | 4.8          | 82.9                        | 11.1                        | 4.8                         | 1.2                         |
| 3Mo/Al      | 2.1          | 83.2                        | 10.5                        | 3.3                         | 3.0                         |

Reaction conditions: TOS = 4 h, T = 383 K, P = 0.1 MPa, WHSV = 1.5 g•g<sup>-1</sup>•h<sup>-1</sup> (feed composition of metathesis reaction: 53 mol % ethene, 44 mol % 2-butene and 3 mol % 1-butene), ethene/2-butene = 1.2 (molar ratio). (note: C<sub>7+</sub><sup>=</sup> is used to denote the products in the C<sub>7</sub>-C<sub>10</sub> range)

**Table S2.** Mo content of the supported Mo-based catalysts.

| Catalyst    | Mo weight percentage (wt%) <sup>[a]</sup> |
|-------------|-------------------------------------------|
| 3Mo/hZ      | 2.6                                       |
| 3Mo/hZ-10Al | 2.8                                       |
| 3Mo/hZ-30Al | 2.8                                       |
| 3Mo/hZ-50Al | 3.2                                       |
| 3Mo/hZ-70Al | 3.2                                       |
| 3Mo/hZ-90Al | 3.0                                       |
| 3Mo/Al      | 2.8                                       |

[a] measured by X-ray fluorescence (XRF).
